# Supplementary material
Source: publisher figshare collection journal article supplement (https://acs.figshare.com/ndownloader/files/14985959)
Supplement: Supplementary file 1 [file 14985959]

# Peptide Oligomerization Memory Effects and Their Impact on the Physical Stability of the GLP-1 Agonist Liraglutide

Jameson R. Bothe<sup>†\*</sup>, Alexandra Andrews<sup>§</sup>, Katelyn J. Smith<sup>§</sup>, Leo A. Joyce<sup>†</sup>, Yogita Krishnamachari<sup>§</sup>, Sandhya Kashi<sup>†</sup>

<sup>†</sup>Process Research and Development, Merck & Co., Inc. Rahway, NJ, USA

<sup>§</sup>Pharmaceutical Sciences, Merck & Co., Inc. Rahway, NJ, USA

## Supporting Information

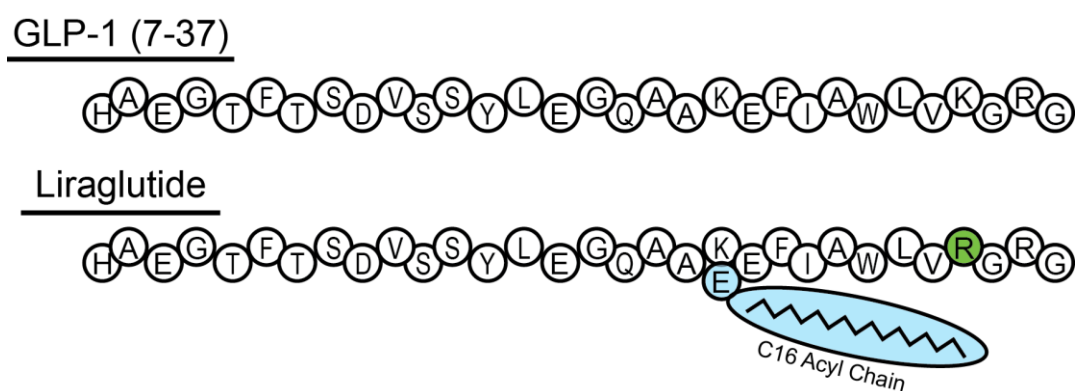

**Figure S1.** Comparison of Liraglutide to the GLP-1 (7-37) peptide. Highlighted are the sites of conjugation (blue) and amino acid substitution (green).

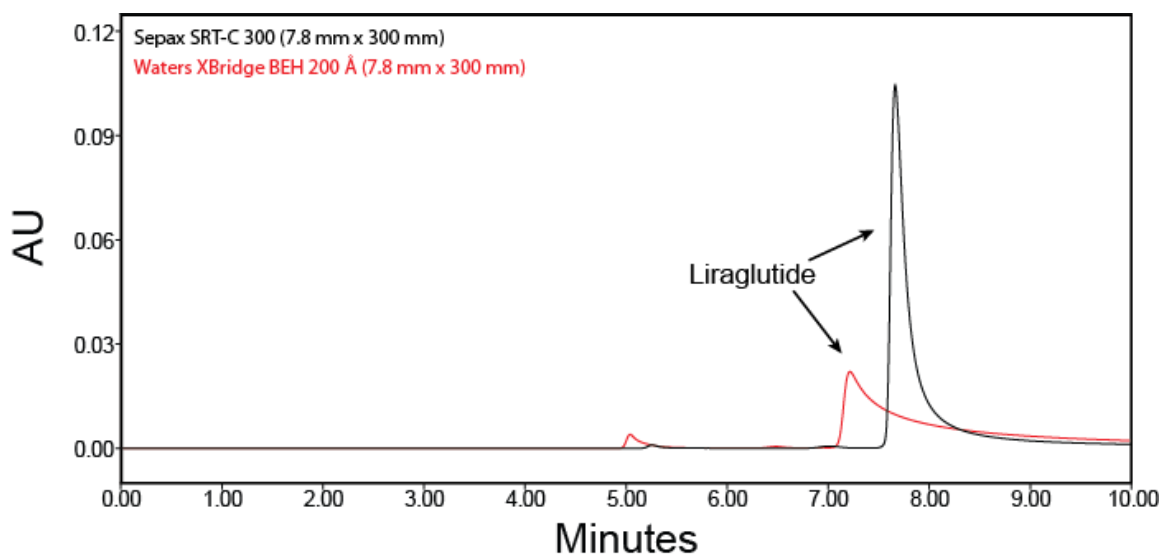

**Figure S2.** Challenges of SEC method development for conjugated peptides with C16 acyl chain. Example shown is a comparison between a Sepax “C” series column and a Waters Xbridge BEH SEC column. The mobile phase was 10 mM sodium phosphate pH 8.1 with a flow rate of 1.0 mL/min and an injection volume of 5  $\mu$ L of 4 mg/mL Liraglutide pH 8.1. We have observed similar effects for other acylated peptides where the Sepax column provides good performance with minimal secondary interactions.

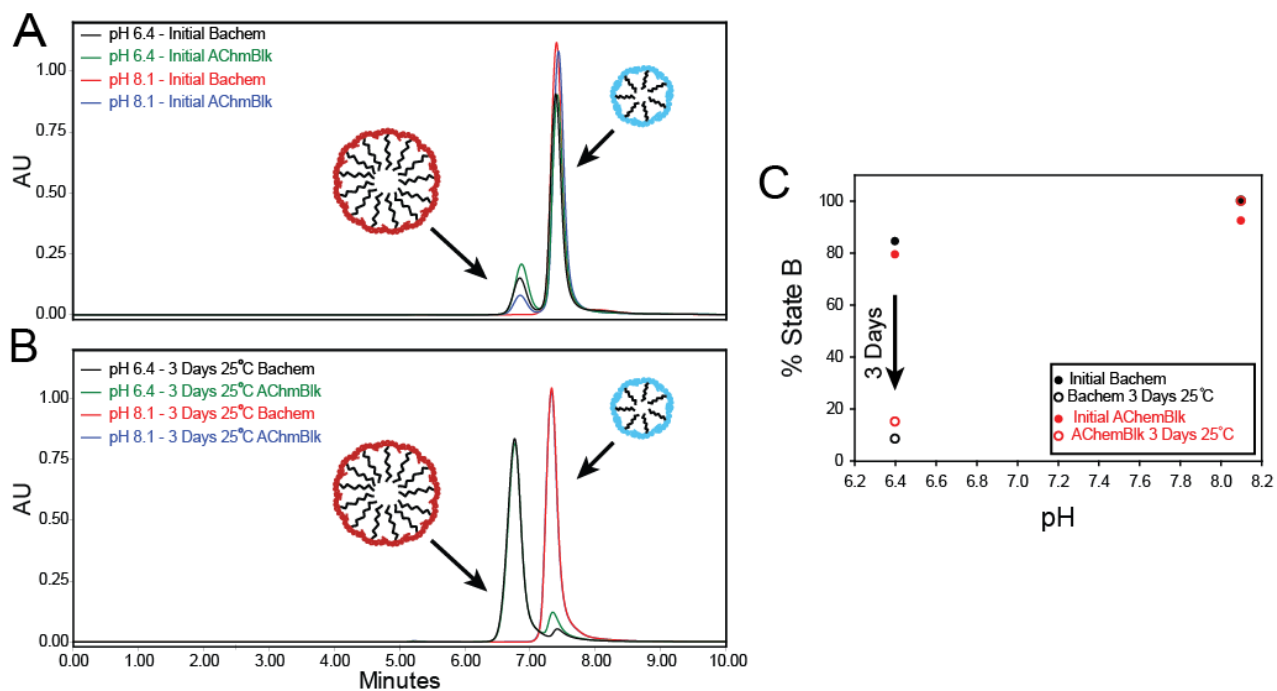

**Figure S3.** Comparison of synthetic Liraglutide sourced from different vendors Bachem and AChemblock. A) SEC chromatograms of 8 mg/mL Liraglutide solutions at pH 6.4 and 8.1 recorded immediately after preparation of Liraglutide sourced from Bachem and AChemblock. B) SEC chromatograms of 8 mg/mL Liraglutide solutions at pH 6.4 and 8.1 recorded after incubation at 25 °C for 3 days of Liraglutide sourced from Bachem and AChemblock. C) Population of State B determined by SEC peak areas immediately after preparation (filled circles) and after incubation at 25 °C for 3 days (open circles) of Liraglutide sourced from Bachem (black) and Achemblock (red).

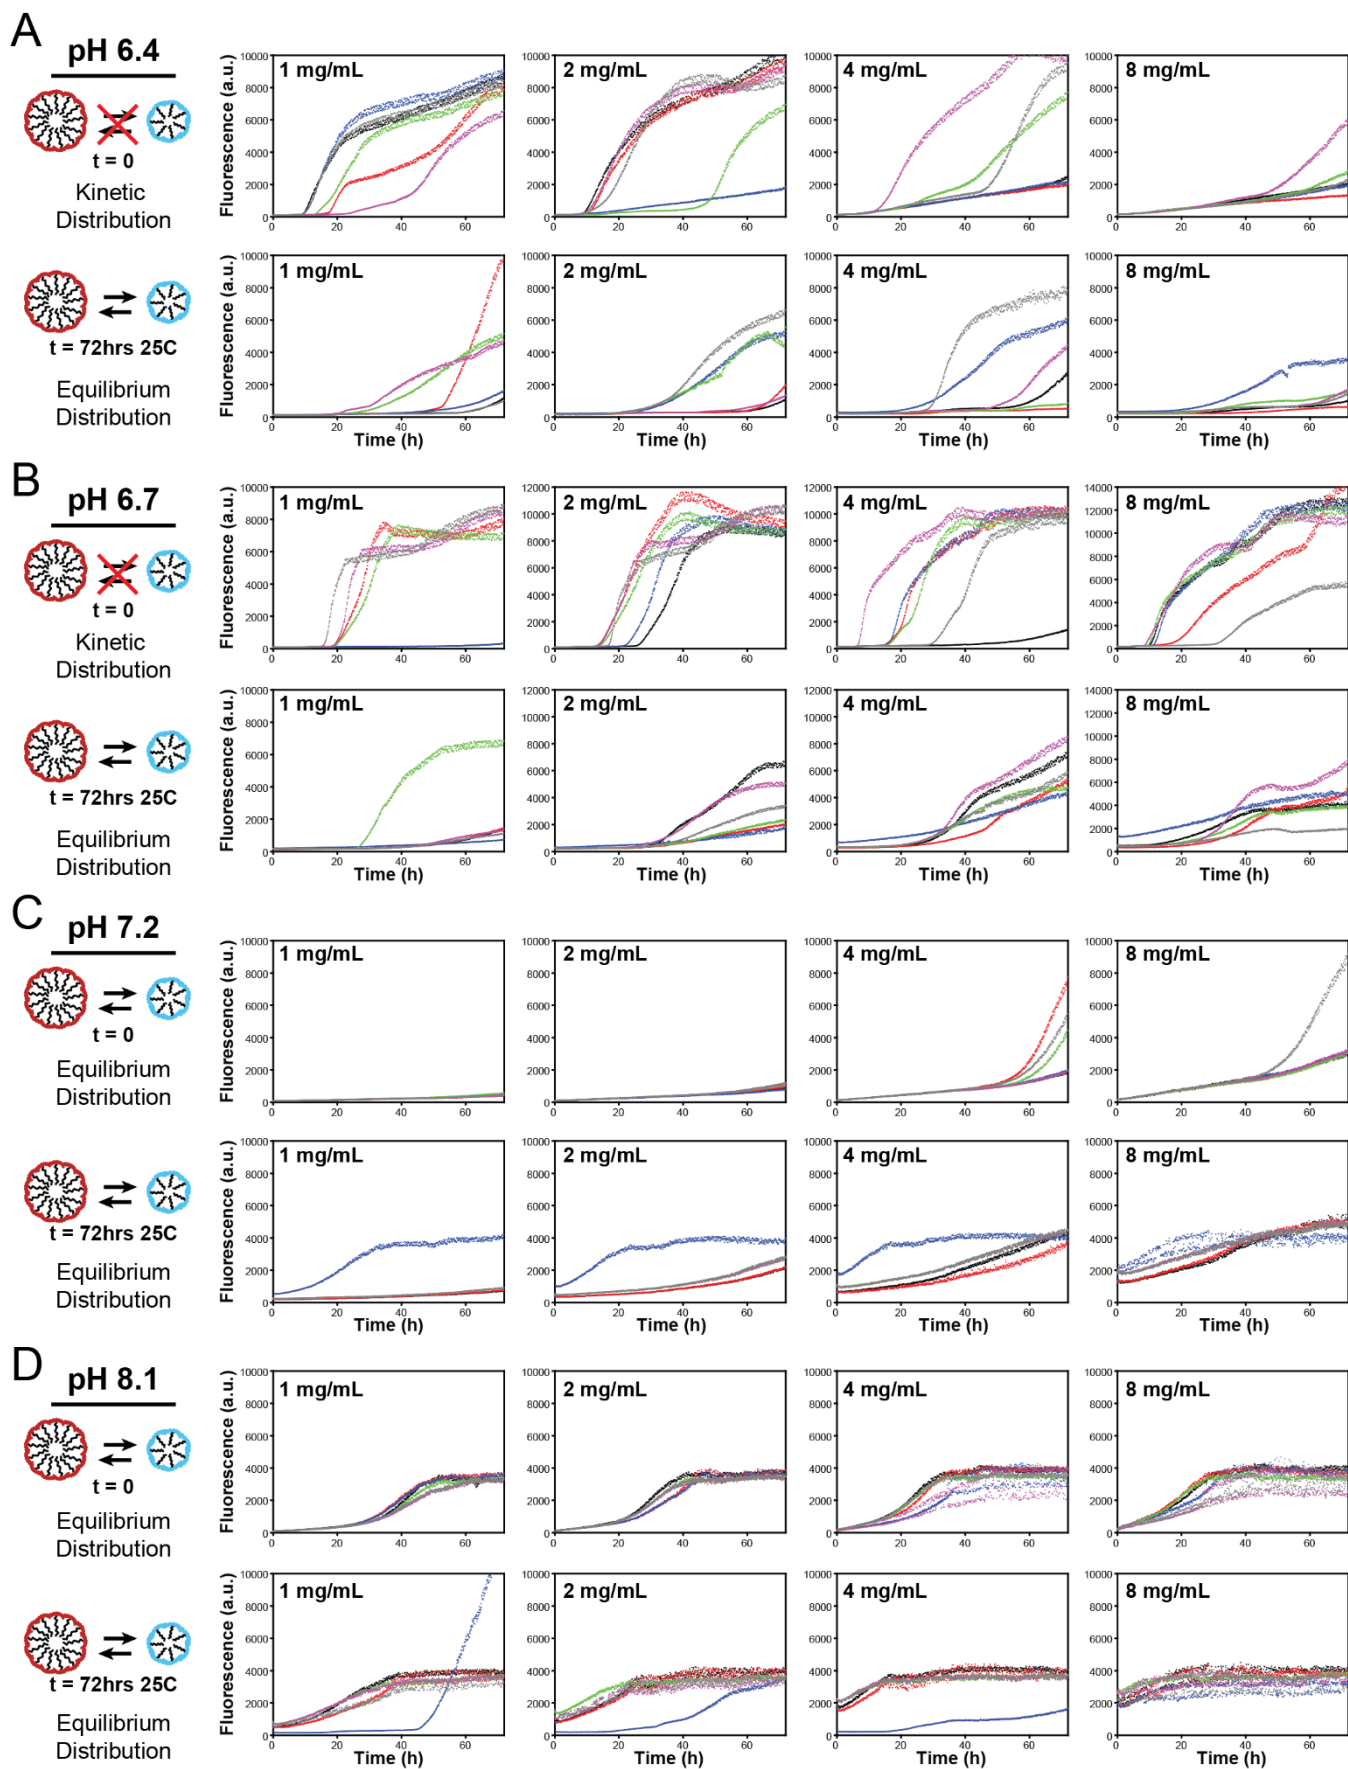

**Figure S4.** Fibrillation of 1-8 mg/mL Liraglutide solutions upon immediate sample preparation and after incubation at 25 °C for three days. A: ThioflavinT fluorescence profile recorded during physical stress of Liraglutide solutions at pH 6.4 immediately after preparation (top) and after incubation at 25 °C for three days (bottom). B: ThioflavinT fluorescence profile recorded during physical stress of Liraglutide solutions at pH 6.7 immediately after preparation (top) and after incubation at 25 °C for three days (bottom). C: ThioflavinT fluorescence profile recorded during physical stress of Liraglutide solutions at pH 7.2 immediately after preparation (top) and after incubation at 25 °C for three days (bottom). D: ThioflavinT fluorescence profile recorded during physical stress of Liraglutide solutions at pH 8.1 immediately after preparation (top) and after incubation at 25 °C for three days (bottom).

## pH 6.4 Kinetic

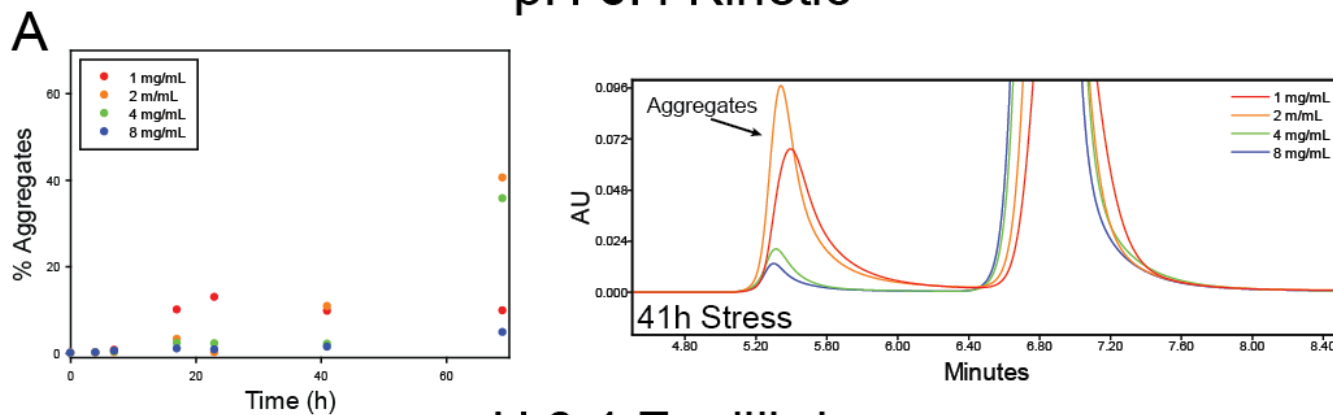

## pH 6.4 Equilibrium

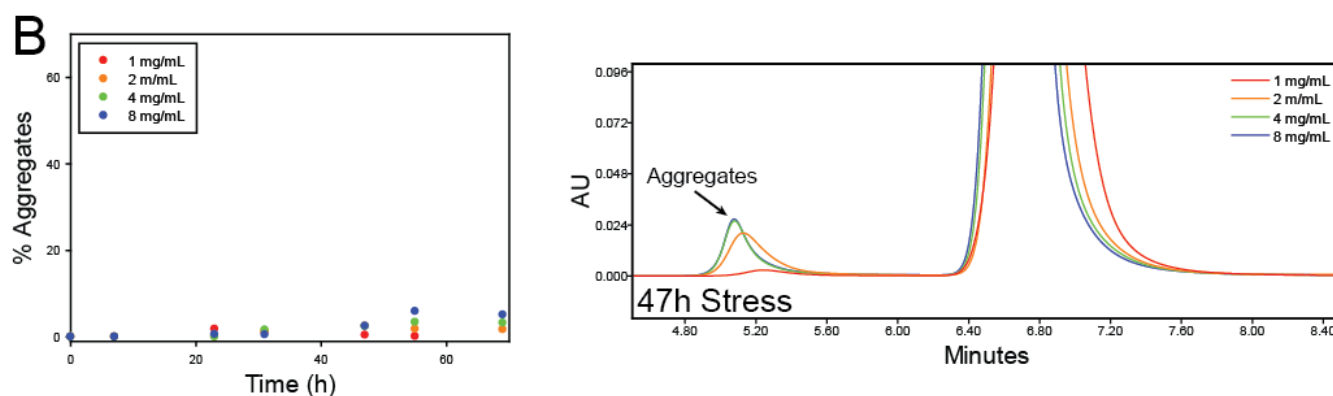

## pH 8.1 Equilibrium

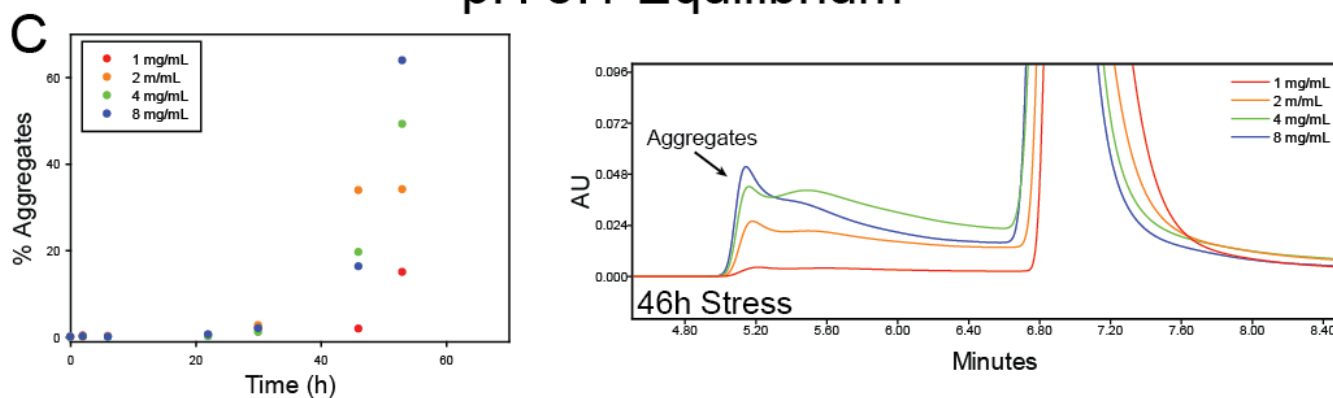

**Figure S5.** SEC characterization of soluble species collected during thioflavin T physical stress. Samples were collected from the stress plate and injected neat onto the column for SEC-MALS characterization. A) Samples collected from pH 6.4 kinetic equilibrium stress. Left, Percentage of high molecular weight aggregates relative to a reference standard. Right, example SEC chromatograms for samples collected at 41 hours. Note the low level of aggregates at 1 mg/mL at 69 hours had a corresponding significantly low level of fluorescence in the thioflavin T stress profile. B) Samples collected from pH 6.4 equilibrium stress. Left, Percentage of high molecular weight aggregates relative to a reference standard. Right, example SEC chromatograms for samples collected at 47 hours. C) Samples collected from pH 8.1 equilibrium stress. Left, Percentage of high molecular weight aggregates relative to a reference standard. Right, example SEC chromatograms for samples collected at 46 hours.

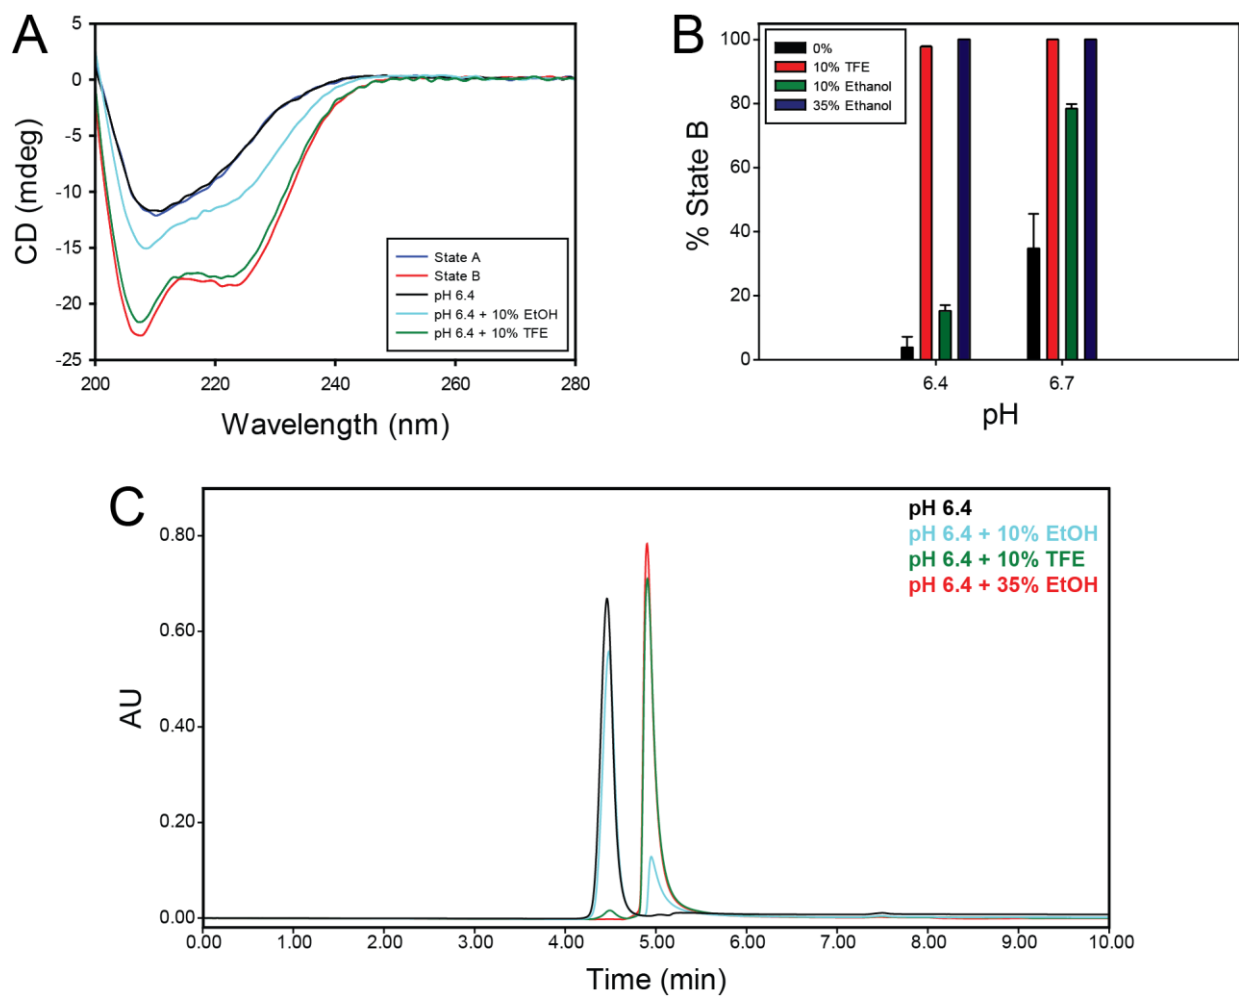

**Figure S6.** Influence of alcohols on Liraglutide's oligomerization states. A) CD spectra of pH 6.4 Liraglutide solutions incubated with and without TFE and ethanol. Reference spectra for pure States A and B are shown. B) Populations of Liraglutide State B at pH 6.4 and pH 6.7 determined by SEC after incubation of 2 mg/mL Liraglutide at room temperature with TFE and ethanol (concentrations indicated in key). C) SEC chromatograms of pH 6.4 Liraglutide after incubation with and without TFE and ethanol.

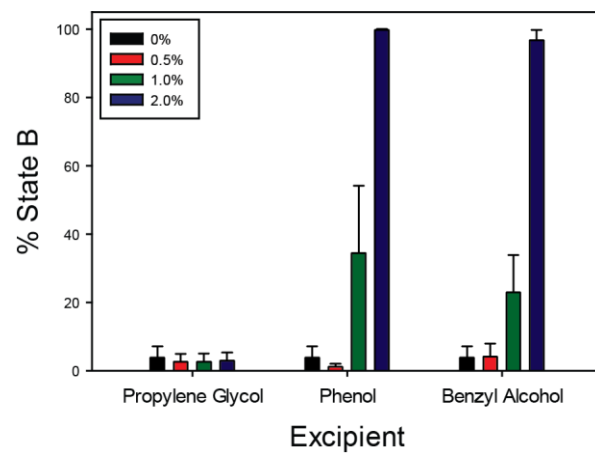

**Figure S7.** Influence of excipients on Liraglutide's oligomerization states. Shown are the populations of Liraglutide State B at pH 6.4 determined by SEC after storage of 2 mg/mL Liraglutide for 48 hours at room temperature with varying excipients (concentrations indicated in key).
